# Supplementary material for: Antimicrobially Active Semen Extenders Allow the Reduction of Antibiotic Use in Pig Insemination
Source: MDPI journal article supplement (doi:10.3390/antibiotics10111319), 2021-10-29
Supplement: s1 [file s1]

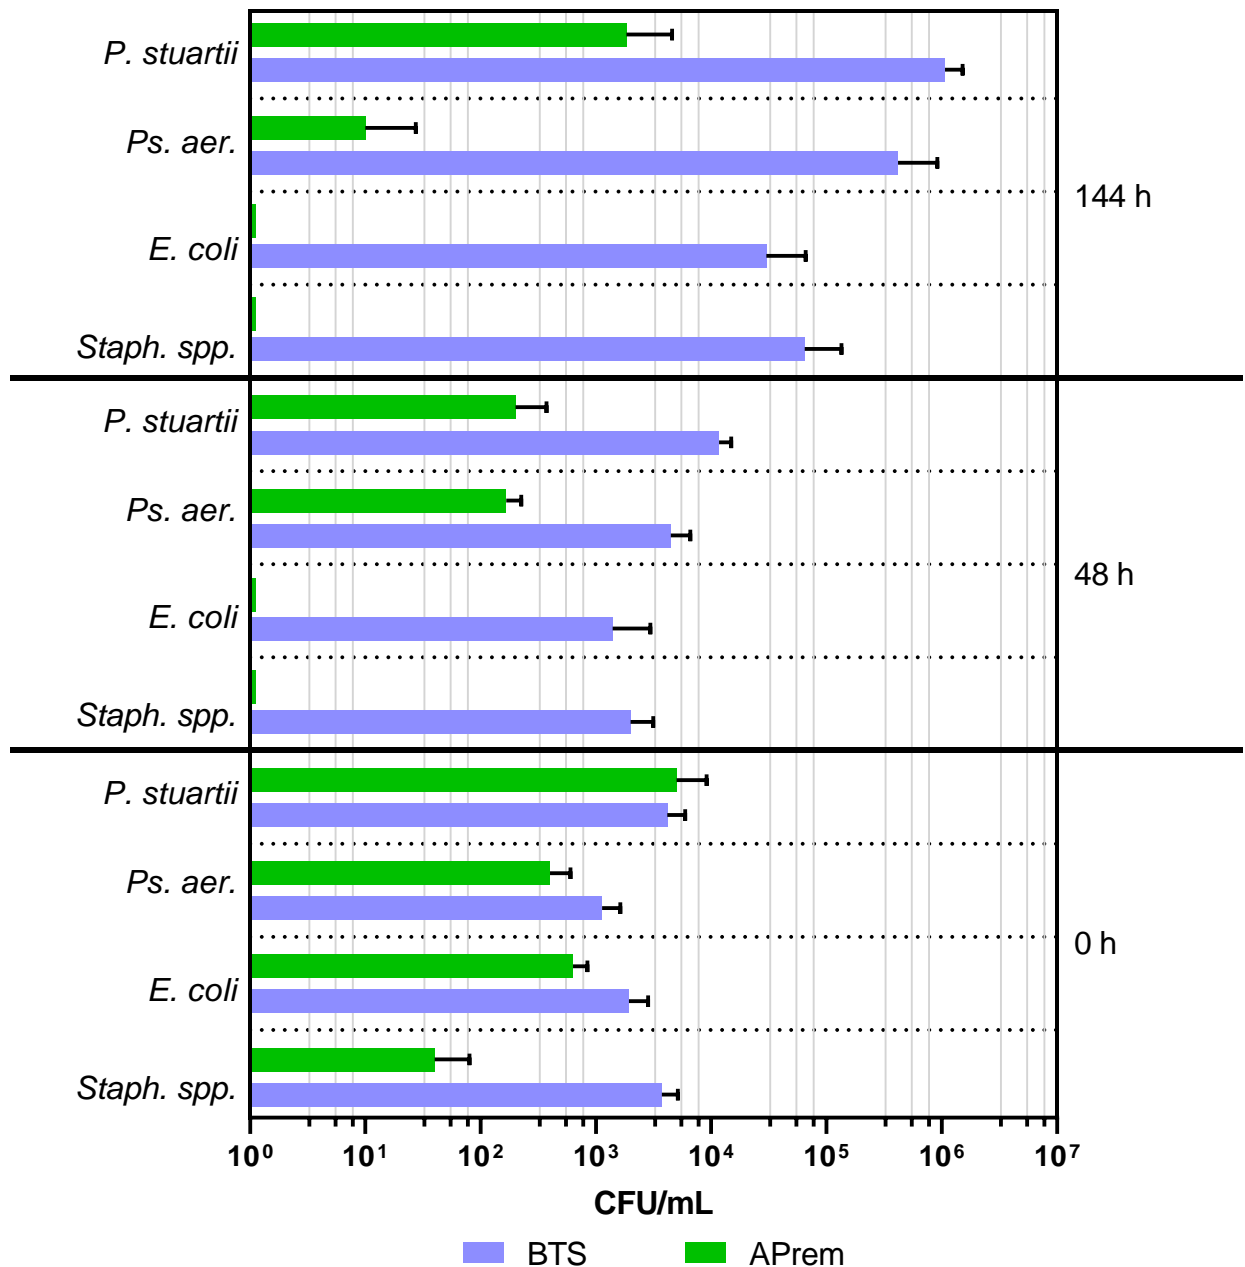

**Supplementary Figure S1.** Bacterial counts (CFU/mL) in boar semen samples extended with antibiotic-free semen extenders Beltsville Thawing Solution (BTS) or Androstar Premium (APrem). Semen samples were inoculated (0 h) with one of the four bacterial strains: *Staphylococcus species* (*Staph. spp.*), *Escherichia coli* (*E. coli*), *Pseudomonas aeruginosa* (*Ps. aer.*), *Providencia stuartii* (*P. stuartii*) and then stored for up to 144 h at 17 °C. Data are presented as means and standard deviation (n = 3 boars, Experiment 3).
